# Supplementary material for: Biotransformation of substituted pyridines with dioxygenase-containing microorganisms
Source: Royal Society of Chemistry journal article supplement (doi:10.1039/b606113c), 2006-01-01
Supplement: b606113c.pdf [file b606113c.pdf]

## Biotransformation of Substituted Pyridines with Dioxxygenase-containing Microorganisms.

Mark D. Garrett<sup>a</sup>, Robin Scott<sup>a</sup>, Gary N. Sheldrake\*<sup>a</sup>, Howard Dalton<sup>b</sup> and Paul Goode<sup>b</sup>.

### Electronic Supplementary Information.

#### Spectroscopic data for compounds 4a, 4c, 4d, 4e, 4f, 5a, 5b, 5c, 6a, 6c, 7a, 7c, 7d, 7e and 8

**2-Ethyl-3-hydroxypyridine (4a).**  $\delta_H$  (300 MHz, CDCl<sub>3</sub>) 1.22 (3H, t,  $J = 7.4$  Hz, CH<sub>3</sub>), 2.85 (2H, q,  $J = 7.4$  Hz, CH<sub>2</sub>CH<sub>3</sub>), 6.30 (1H, br. s, OH), 6.90 (1H, dd,  $J = 8.0$  Hz,  $J = 4.8$  Hz, 5-H), 7.05 (1H, d,  $J = 8.0$  Hz, 4-H), 7.94 (1H, d,  $J = 4.8$  Hz, 6-H);  $\delta_C$  (75 MHz, CDCl<sub>3</sub>) 11.6 (CH<sub>3</sub>), 24.4 (CH<sub>2</sub>), 121.3 (CH), 121.7 (CH), 138.3 (CH), 150.4 (C), 150.7 (C);  $m/z$  (EI) 123 (M<sup>+</sup>, 73%), 122 (M<sup>+</sup>-H, 100%), 106 (M<sup>+</sup>-OH, 35%).

**3-Hydroxy-2-methylpyridine (4c).**  $\delta_H$  (500 MHz, d<sup>6</sup>-DMSO) 2.37 (3H, s, CH<sub>3</sub>), 7.08 (1H, dd,  $J = 8.1$  Hz,  $J = 4.6$  Hz, 5-H), 7.13 (1H, dd,  $J = 8.1$  Hz,  $J = 1.4$  Hz, 4-H), 7.93 (1H, dd,  $J = 4.6$  Hz,  $J = 1.4$  Hz, 6-H), 9.72 (1H, s, OH);  $\delta_C$  (125 MHz, d<sup>6</sup>-DMSO) 19.9 (CH<sub>3</sub>), 121.6 (CH), 122.7 (CH), 140.6 (CH), 147.1 (C), 153.0 (C);  $m/z$  (EI) 109 (M<sup>+</sup>, 100%), 94 (M<sup>+</sup>-CH<sub>3</sub>, 10%).

**2-Chloro-3-hydroxypyridine (4d).**  $\delta_H$  (500 MHz, CD<sub>3</sub>OD) 7.22 (1H, dd,  $J = 8.0$  Hz,  $J = 4.6$  Hz, 5-H), 7.31 (1H, dd,  $J = 8.0$  Hz,  $J = 1.5$  Hz, 4-H), 7.83 (1H, dd,  $J = 4.6$  Hz,  $J = 1.5$  Hz, 6-H);  $\delta_C$  (125 MHz, CD<sub>3</sub>OD) 125.7 (CH), 125.5 (CH), 139.1 (CH), 140.9 (C), 152.4 (C);  $m/z$  (EI) 131 (M<sup>+</sup> (<sup>37</sup>Cl), 51%), 129 (M<sup>+</sup> (<sup>35</sup>Cl), 100%), 93 (M<sup>+</sup>-Cl, 97%).

**2-Bromo-3-hydroxypyridine (4e).**  $\delta_H$  (500 MHz, CDCl<sub>3</sub>) 5.61 (1H, s, OH), 7.20 (1H, dd,  $J = 7.9$  Hz,  $J = 4.6$  Hz, 5-H), 7.29 (1H, d,  $J = 7.9$  Hz,  $J = 1.6$  Hz, 4-H), 7.98 (1H, d,  $J = 4.6$  Hz,  $J = 1.6$  Hz, 6-H);  $\delta_C$  (125 MHz, CDCl<sub>3</sub>) 121.8 (CH), 123.1 (CH), 129.8 (CH), 140.6 (C), 148.5 (C);  $m/z$  (EI) 176 (M<sup>+</sup> (<sup>81</sup>Br), 67%), 174 (M<sup>+</sup> (<sup>79</sup>Br), 70%), 173 (M<sup>+</sup> (<sup>79</sup>Br) - H, 80%), 94 (M<sup>+</sup>-Br, 100%).

**3-Hydroxypyridine (4f).**  $\delta_H$  (500 MHz, CD<sub>3</sub>OD) 7.23 (2H, m, 4-H), 8.05 (1H, d,  $J = 3.7$  Hz, 6-H), 8.25 (1H, s, 2-H);  $m/z$  (EI) 95 (M<sup>+</sup>, 100%), 76 (60%), 41 (72%).

**(R)-1-(2-Pyridyl)ethanol (5a).**  $\delta_H$  (500 MHz, CDCl<sub>3</sub>) 1.35 (3H, d,  $J = 6.6$  Hz, CH<sub>3</sub>), 4.78 (1H, q,  $J = 6.6$  Hz, CHOH), 5.27 (1H, br. s, OH), 6.99 (1H, m, 4-H), 7.27 (1H, d,  $J = 7.8$  Hz, 3-H), 7.51 (1H, dt,  $J = 7.7$  Hz,  $J = 1.8$  Hz, 5-H), 8.28 (1H, dm,  $J = 4.1$  Hz, 6-H);  $\delta_C$  (125 MHz, CDCl<sub>3</sub>) 22.0 (CH<sub>3</sub>), 67.5 (CH), 117.7 (CH), 120.0 (CH), 135.0 (CH), 146.1 (C), 162.2 (CH);  $m/z$  (EI) 123 (M<sup>+</sup>, 17%), 122 (M<sup>+</sup>-H, 45%), 108 (M<sup>+</sup>-CH<sub>3</sub>, 93%), 106 (M<sup>+</sup>-OH, 99%), 80 (M<sup>+</sup>-C<sub>2</sub>H<sub>5</sub>O, 100%);  $CD$   $\lambda$  269 nm  $\Delta\epsilon$  -0.138,  $\lambda$  266 nm  $\Delta\epsilon$  +0.915,  $\lambda$  262 nm  $\Delta\epsilon$  -0.129,  $\lambda$  256 nm  $\Delta\epsilon$  +0.515,  $\lambda$  239 nm  $\Delta\epsilon$  +4.519.

**(R)-1-(2-Pyridyl)-1-propanol (5b).**  $\delta_H$  (500 MHz, CDCl<sub>3</sub>) 0.95 (3H, t,  $J = 7.4$  Hz, CH<sub>3</sub>), 1.73 (1H, m, CH<sub>2</sub>CH<sub>3</sub>), 1.89 (1H, m, CH<sub>2</sub>CH<sub>3</sub>), 4.69 (1H, t,  $J = 5.8$  Hz, CHOH), 7.18 (1H, m, 4-H), 7.27 (1H, d,  $J = 10.7$  Hz, 3-H), 7.67 (1H, m, 5-H), 8.53 (1H, d,  $J = 4.7$  Hz, 6-H);  $\delta_C$  (125 MHz, CDCl<sub>3</sub>) 9.8 (CH<sub>3</sub>), 31.7 (CH<sub>2</sub>), 74.2 (CH), 120.8 (CH), 122.6 (CH), 137.0 (CH), 148.5 (C), 162.4 (CH);  $m/z$  (EI) [silylated with BSTFA] 209 (M<sup>+</sup>, 10%), 194 (M<sup>+</sup>-CH<sub>3</sub>, 56%), 180 (M<sup>+</sup>-CH<sub>2</sub>CH<sub>3</sub>, 75%), 166 (100%);  $CD$   $\lambda$  268 nm  $\Delta\epsilon$  -0.123,  $\lambda$  266 nm  $\Delta\epsilon$  +0.002,  $\lambda$  263 nm  $\Delta\epsilon$  -0.009.

**(2-Pyridyl)methanol (5c).**  $\delta_H$  (500 MHz, CDCl<sub>3</sub>); 4.45 (1H, br. s, OH), 4.77 (2H, s, CH<sub>2</sub>OH), 7.21 (1H, m, 5-H), 7.26 (1H, d,  $J = 7.6$  Hz, 3-H), 7.68 (1H, m, 4-H), 8.56 (1H, d,  $J = 4.8$  Hz, 6-H);  $\delta_C$  (125 MHz, CDCl<sub>3</sub>) 64.1 (CH<sub>2</sub>), 120.6 (CH), 122.4 (CH), 136.7 (CH), 148.4 (C), 158.0 (CH);  $m/z$  (EI) 109 (M<sup>+</sup>, 91%), 108 (M<sup>+</sup>-H, 100%), 80 (90%).

**(R)-1-(3-Pyridyl)ethanol (6a).**  $\delta_H$  (500 MHz, CDCl<sub>3</sub>) 1.53 (3H, d,  $J = 6.4$  Hz, CH<sub>3</sub>), 4.96 (1H, q,  $J = 6.4$  Hz, CHOH), 7.29 (1H, m, 5-H), 7.74 (1H, dd,  $J = 7.9$  Hz,  $J = 1.7$  Hz, 4-H), 8.50 (1H, d,  $J = 4.7$  Hz, 6-H), 8.59 (1H, s, 2-H);  $\delta_C$  (125 MHz, CDCl<sub>3</sub>) 25.2 (CH<sub>3</sub>), 68.2 (CH), 123.1 (C), 133.1 (CH), 141.1 (CH), 147.5 (CH), 148.0 (CH);  $m/z$  (EI) 123 (M<sup>+</sup>, 79%), 108 (M<sup>+</sup>-CH<sub>3</sub>, 99%), 80 (M<sup>+</sup>-COCH<sub>3</sub>, 100%).

**(3-Pyridyl)methanol (6c).**  $\delta_H$  (500 MHz,  $\text{CDCl}_3$ ) 4.63 (2H, s,  $\text{CH}_2\text{OH}$ ), 7.20 (1H, m, 5-H), 7.65 (1H, d,  $J = 8.1$  Hz, 4-H), 8.35 (1H, d,  $J = 4.8$  Hz, 6-H), 8.41 (1H, s, 2-H);  $\delta_C$  (125 MHz,  $\text{CDCl}_3$ ) 62.2 ( $\text{CH}_2$ ), 123.6 (C), 135.2 (CH), 137.0 (CH), 148.1 (CH), 148.7 (CH);  $m/z$  (EI) 109 ( $\text{M}^+$ , 87%), 108 ( $\text{M}^+ - \text{H}$ , 100%), 91 ( $\text{M}^+ - \text{H}_2\text{O}$ , 22%).

**4-Ethyl-3-hydroxypyridine (7a).**  $\delta_H$  (500 MHz,  $\text{CDCl}_3$ ) 1.19 (3H, t,  $J = 7.5$  Hz,  $\text{CH}_3$ ), 2.66 (2H, q,  $J = 7.5$  Hz,  $\text{CH}_2\text{CH}_3$ ), 7.08 (1H, d,  $J = 4.9$  Hz, 5-H), 7.93 (1H, d,  $J = 4.9$  Hz, 6-H), 8.18 (1H, s, 2-H);  $\delta_C$  (125 MHz,  $\text{CDCl}_3$ ) 11.3 ( $\text{CH}_3$ ), 21.9 ( $\text{CH}_2$ ), 123.8 (CH), 130.1 (C), 133.3 (CH), 145.1 (CH), 154.0 (C);  $m/z$  (EI) 123 ( $\text{M}^+$ , 78%), 122 ( $\text{M}^+ - \text{H}$ , 97%), 108 ( $\text{M}^+ - \text{CH}_3$ , 100%), 94 ( $\text{M}^+ - \text{CH}_2\text{CH}_3$ , 45%).

**3-Hydroxy-4-methylpyridine (7c).**  $\delta_H$  (500 MHz,  $\text{CDCl}_3$ ) 2.24 (3H, s,  $\text{CH}_3$ ), 7.06 (1H, d,  $J = 4.9$  Hz, 5-H), 7.88 (1H, d,  $J = 4.9$  Hz, 6-H), 8.14 (1H, s, 2-H);  $\delta_C$  (125 MHz,  $\text{CDCl}_3$ ) 14.8 ( $\text{CH}_3$ ), 125.4 (CH), 133.7 (C), 135.4 (CH), 137.7 (CH), 153.3 (C);  $m/z$  (EI) [Silylated using BSTFA] 181 ( $\text{M}^+$ , 64%), 166 ( $\text{M}^+ - \text{CH}_3$ , 100%).

**4-Chloro-3-hydroxypyridine (7d).**  $\delta_H$  (500 MHz,  $\text{CD}_3\text{OD}$ ) 7.26 (1H, d,  $J = 5.0$  Hz, 5-H), 7.84 (1H, d,  $J = 5.0$  Hz, 6-H), 8.05 (1H, s, 2-H);  $\delta_C$  (125 MHz,  $\text{CD}_3\text{OD}$ ) 124.7 (CH), 130.3 (C), 137.2 (CH), 139.3 (CH), 150.7 (C);  $m/z$  (EI) 131 ( $\text{M}^+ (^{37}\text{Cl})$ , 46%), 129 ( $\text{M}^+ (^{35}\text{Cl})$ , 100%), 94 ( $\text{M}^+ - \text{Cl}$ , 10%).

**4-Bromo-3-hydroxypyridine (7e).**  $\delta_H$  (500 MHz,  $\text{CDCl}_3$ ) 7.54 (1H, d,  $J = 5.1$  Hz, 5-H), 7.97 (1H, d,  $J = 5.1$  Hz, 6-H), 8.28 (1H, s, 2-H);  $\delta_C$  (125 MHz,  $\text{CDCl}_3$ ) 121.9 (CH), 128.8 (C), 137.2 (CH), 140.8 (CH), 152.3 (C);  $m/z$  (EI) 175 ( $\text{M}^+ (^{81}\text{Br})$ , 92%), 173 ( $\text{M}^+ (^{79}\text{Br})$ , 100%), 93 ( $\text{M}^+ - \text{Br}$ , 45%).

**5-Chloro-3-hydroxypyridine (8).**  $\delta_H$  (500 MHz,  $\text{d}^6$ -acetone) 7.14 (1H, s, 4-H), 8.0 (1H, s, 6-H), 8.07 (1H, s, 2-H);  $\delta_C$  (125 MHz,  $\text{d}^6$ -acetone) 122.3 (C), 129.4 (CH), 136.5 (CH), 139.3 (CH), 151.8 (C);  $m/z$  (EI) 131 ( $\text{M}^+ (^{37}\text{Cl})$ , 34%), 129 ( $\text{M}^+ (^{35}\text{Cl})$ , 100%), 94 ( $\text{M}^+ - \text{Cl}$ , 41%).
